# Supplementary material for: Decreased water temperature enhance Piscine orthoreovirus genotype 3 replication and severe heart pathology in experimentally infected rainbow trout
Source: Front Vet Sci. 2023 Feb 10;10:1112466. doi: 10.3389/fvets.2023.1112466 (PMC9950551; doi:10.3389/fvets.2023.1112466)
Supplement: Supplementary file 2 [file Table_1.XLSX]

## Sheet: PRV-3 gblock sequence
Sequence of PRV-3 gBlock
TACAGGTCGTGTTCCCGTTGTGGTGTGGGAGGAACCGAGAGAAGAATACAGATTCAGGTTGGATGGAGCGCGTGATCTACCTCGTGGCTGGAAAAACGATCTTCAAGGGGACTGAAGACAACAGTCGTGGTTCCAATGACAGACCAGACCGACGGGGGATCGCTGAAGCTAAGCGACGCCTTAGAGACAACATGCGAAGCATAATGAAGAAAAAGACCACTGGTGATCTTGGTTTTAGTGGTTGGATGGTCCTCGACCCGGA

## Sheet: SD values_Immune genes
Standard deviation (SD) of immune gene expression log2 transformed RQ values for each experimental group.
NA indicated that there was only one individual in the group, and therefore SD could not be calculated.
Temperature	Group	Treatment	WPC	MX	CD4	CD8	IFNG	RSAD2	IFNc3	TNF	IL1B	IRF8	MHC class II	GZMA	RIG-I	ISG15	TLR3	CXCL10	SAA	IFIT5	IFI44	IRF1	CSFR1
5	Cohabitant	Control	8	2.0933	0.0347645	0.0971556	2.25597	0.970114	1.5481	0.859753	2.34372	0.250795	1.36775	0.0393593	0.621084	0.321903	0.120263	0.332733	2.555	0.723127	0.384918	0.321055	1.01054
5	Cohabitant	Control	10	0.573663	0.390991	0.97405	3.58174	0.438219	1.63365	0.504056	0.268426	0.0975379	0.310938	0.55411	0.444786	0.420311	0.101521	0.326697	0.286345	0.324196	0.48271	0.1076	0.210913
5	Cohabitant	Control	12	0.922571	0.366948	0.553058	3.54526	1.8954	4.99358	0.359538	0.0676975	0.445683	0.887701	0.334683	1.14769	0.156627	0.594047	0.906616	1.20633	0.775834	1.06886	0.0830144	0.564942
12	Cohabitant	Control	2	0.509973	0.330912	0.164918	2.27136	0.472353	5.26532	0.301757	0.992578	0.193232	0.231128	0.998991	0.393791	0.348959	0.174764	0.761034	1.43705	0.375091	0.0865397	0.180291	0.306805
12	Cohabitant	Control	2	NA	NA	NA	NA	NA	NA	NA	NA	NA	NA	NA	NA	NA	NA	NA	NA	NA	NA	NA	NA
12	Cohabitant	Control	4	0.519012	0.591507	1.17539	1.35314	0.63464	1.71137	1.17198	0.430364	1.24791	0.245875	0.82962	0.447382	0.362198	0.339652	0.644101	0.634196	0.406908	0.238362	0.522818	0.572031
12	Cohabitant	Control	6	0.262861	0.000717751	0.768354	4.88557	0.972434	2.80241	0.255236	3.67077	1.25686	0.0920722	1.28265	0.0515161	1.90792	0.166386	1.44906	1.53945	1.25468	0.00376204	1.07343	0.937233
12	Cohabitant	Control	8	1.14955	0.726911	0.278427	6.29767	0.699172	4.28149	0.00152246	0.652981	0.222555	0.156302	0.966933	0.359759	0.863403	0.560868	0.009892	0.908829	0.649811	0.650707	0.350589	0.285149
18	Cohabitant	Control	2	0.274681	0.35029	0.793227	1.49587	0.722867	0.434274	2.54814	2.97925	0.185154	0.445403	0.593421	0.257353	0.357077	0.612214	0.752613	1.82956	0.534552	0.188725	0.533259	0.673007
18	Cohabitant	Control	4	0.144732	0.818828	3.3047	0.671737	0.915796	8.54505	0.253895	5.38909	2.30603	0.425599	0.413226	0.186172	2.32575	1.28886	1.35964	1.56526	3.49462	1.00911	1.65599	2.26907
18	Cohabitant	Control	6	1.45988	1.50943	1.99169	5.1721	1.42928	1.402	3.78096	6.78062	1.07676	0.261365	1.55158	2.00583	1.0065	0.18648	1.0038	2.54323	1.08355	0.528436	1.45843	1.2752
18	Cohabitant	Control	8	0.309014	0.1212	0.724183	1.09763	1.26735	0.915339	0.456489	0.502991	0.627176	0.66189	1.21286	0.619023	0.880184	0.42577	1.1719	0.871052	0.332454	0.216857	0.275687	0.619859
5	Cohabitant	Exposed	8	0.671407	0.207799	0.847833	3.30812	0.937155	3.09296	1.87428	0.873754	0.428742	0.43318	0.81504	0.691722	0.906648	0.563549	0.750958	1.13448	1.09865	0.412456	0.381107	0.592061
5	Cohabitant	Exposed	10	2.00543	0.5667	0.809516	3.70387	2.05028	1.45363	0.403289	0.859595	0.462203	0.55295	1.13573	1.66378	2.14494	0.876416	2.50242	0.927329	1.40657	0.901668	1.06397	0.367956
5	Cohabitant	Exposed	12	0.45377	0.496047	0.487796	2.56242	0.582998	0.910111	0.748918	1.94366	0.530591	0.877735	0.444289	0.576164	0.325959	0.481365	0.751209	0.157633	0.388665	0.439782	0.438096	0.404099
12	Cohabitant	Exposed	2	0.850146	0.222247	0.512072	1.51739	0.747241	3.40154	1.45796	0.722954	0.327523	0.267295	1.7736	0.865497	1.36673	0.600256	0.817466	1.64634	0.633425	0.581714	0.387505	0.310619
12	Cohabitant	Exposed	4	3.16666	0.336294	1.20948	5.58098	2.99553	4.42353	0.766015	3.48271	1.8585	0.441625	2.7581	1.29097	3.0415	0.455473	2.65708	1.06188	2.6623	0.576772	1.07171	1.57545
12	Cohabitant	Exposed	6	0.318237	0.422171	1.08976	3.18568	0.75489	0.738546	0.993069	2.97016	0.773743	0.703379	0.538914	0.732862	0.42465	0.6412	0.620825	0.996908	0.428068	0.319354	0.383902	0.817996
12	Cohabitant	Exposed	8	0.66351	0.533549	0.293591	4.34985	0.64385	2.42315	0.381363	0.604832	0.557122	0.775334	0.490257	0.363159	0.716664	0.207251	0.778458	1.22705	0.815132	0.336238	0.240599	0.599865
18	Cohabitant	Exposed	2	1.34641	0.263339	0.454615	2.59943	0.842157	0.737027	0.437668	3.77845	0.364849	0.689833	0.265569	1.09898	0.69861	0.590069	0.562743	1.64891	0.67952	0.503111	0.122745	0.383678
18	Cohabitant	Exposed	4	1.29378	0.112034	0.59201	3.15855	2.51711	3.26989	0.845532	2.20621	0.761727	0.211469	1.57578	1.29518	2.37345	0.64066	2.00827	0.434934	1.69285	0.70415	0.921542	0.744435
18	Cohabitant	Exposed	6	1.17724	0.387614	0.769983	2.67742	1.14921	2.15906	1.11064	0.77565	0.655338	0.640728	1.30331	0.786646	0.446464	0.706613	0.765007	1.28259	0.26211	0.419899	0.376697	0.267445
18	Cohabitant	Exposed	8	0.757533	0.479923	0.610895	0.264998	0.448779	3.77098	1.0714	1.24906	0.455188	0.443118	1.19831	0.568617	0.698126	0.568865	0.874543	1.25831	0.800436	0.451502	0.373974	0.647302
5	Shedder	Control	2	1.8656	0.125752	0.391615	0.600819	1.60935	0.585841	0.161716	0.511579	0.627891	0.352516	0.0339408	1.53918	1.50963	0.606449	0.465909	0.435759	1.31589	0.476065	0.270095	0.395011
5	Shedder	Control	4	0.485549	0.571032	0.266889	0.0521938	1.04001	0.942052	0.269711	0.630573	0.245278	0.481665	0.772298	0.182865	1.91149	0.0130074	0.195823	0.195081	0.699378	0.160183	0.0301587	0.695009
5	Shedder	Control	6	0.387599	0.280218	0.33222	2.52482	0.491335	3.19207	0.69168	0.289167	0.389882	0.4501	1.09234	0.636171	1.15912	0.445358	1.3237	0.420836	1.43247	0.162773	0.805748	0.5805
5	Shedder	Control	8	0.575247	0.260282	0.473119	3.60023	0.601985	4.23562	0.455807	0.167664	0.462249	0.559039	0.952407	0.595468	0.770671	0.224387	0.732188	0.663577	0.429992	0.491224	0.408037	0.309948
5	Shedder	Control	10	0.916559	0.675657	0.288785	1.62317	0.367888	3.618	0.0871684	0.369268	0.899535	1.32061	0.824044	0.984561	0.0203463	0.145489	0.581455	1.23475	0.46473	0.632426	0.61266	0.677425
5	Shedder	Control	12	0.167234	0.0761092	0.642197	0.478498	0.558429	1.00184	0.246672	0.434603	0.387939	0.517285	0.662832	0.735973	1.00753	0.192858	0.68003	0.777674	0.932094	0.286932	0.450166	0.397523
12	Shedder	Control	2	0.570056	0.324067	0.296321	0.687709	0.993928	0.342647	0.0596297	1.4325	0.0695793	0.329622	2.08745	0.236967	0.447999	0.124853	0.450528	1.30773	0.232004	0.106792	0.0963806	0.321425
12	Shedder	Control	4	1.28969	0.27642	0.662003	2.5199	0.92292	1.44107	0.543361	3.11281	0.367664	0.238908	2.29194	0.818636	0.435587	0.481313	0.769468	1.07148	0.691909	0.424287	0.221545	0.262868
12	Shedder	Control	6	1.92719	0.278032	0.835713	4.01704	0.646994	3.74792	1.06367	3.11253	0.499628	0.986906	1.42997	2.54269	0.178999	0.563602	0.116188	0.948268	0.913533	0.454384	0.241845	1.09492
18	Shedder	Control	4	0.857313	0.151013	0.528071	5.48605	1.07862	1.63595	0.518353	0.915792	0.312355	0.431562	1.22322	0.689986	1.33451	0.818167	0.635495	0.330257	0.997481	0.553067	0.401034	0.463232
18	Shedder	Control	6	1.83284	0.359431	2.56835	2.29939	0.666375	5.02359	1.78715	3.85938	0.0476389	0.439959	1.01662	0.773967	0.919237	0.687434	0.974778	2.74378	1.26003	0.227595	1.00189	0.385138
5	Shedder	Exposed	2	2.19668	0.68134	0.921462	3.98352	2.72034	3.22689	1.24409	0.989627	0.3161	0.738614	0.764802	1.39345	2.33662	0.629766	0.542292	1.77798	1.89635	0.740686	0.289171	0.630357
5	Shedder	Exposed	4	1.18237	0.237114	0.455567	4.28889	1.92535	1.89782	0.764411	0.873018	0.342536	0.315104	0.721783	1.14375	2.03087	0.516228	1.88409	1.46195	1.36903	0.710204	0.646227	0.424183
5	Shedder	Exposed	6	0.545178	0.390289	0.669956	4.56699	0.310206	1.64291	0.6754	0.568553	0.614961	0.539686	0.702417	0.603868	0.759785	0.484442	0.661698	0.989524	0.569917	0.521417	0.259555	0.580309
5	Shedder	Exposed	8	1.63674	0.402517	0.788152	3.82817	2.8266	1.35003	1.03377	2.07802	0.515572	0.287275	2.26105	1.58731	2.37639	0.555925	0.852502	2.07785	2.08198	0.872268	0.229705	0.385402
5	Shedder	Exposed	10	0.523265	0.304922	0.731972	3.18563	0.582922	2.70156	1.7298	3.06158	0.188885	0.45278	0.974023	0.445579	0.353717	0.49473	0.358074	1.31301	0.575538	0.267543	0.390004	0.259858
5	Shedder	Exposed	12	0.667599	0.313722	0.556749	0.375258	0.60499	2.81926	0.66879	0.932923	0.283176	0.769373	0.541338	0.302302	0.291996	0.352195	0.390447	1.67524	0.363939	0.233017	0.237891	0.41954
12	Shedder	Exposed	2	0.622615	0.446787	0.223132	3.42665	0.518792	1.78146	0.692393	1.09306	0.284991	0.54657	0.994522	0.423689	0.529233	0.228664	0.693218	1.10354	0.5113	0.240705	0.321032	0.302844
12	Shedder	Exposed	4	0.655809	0.293435	0.237397	0.443184	0.357912	1.9191	0.851418	2.56657	0.227915	0.456376	0.498731	0.736214	0.275738	0.309176	0.534534	0.848464	0.315483	0.614269	0.244146	0.5501
12	Shedder	Exposed	6	0.595175	0.456533	0.294301	2.79409	0.539812	2.69036	0.626689	2.69364	0.373167	0.593218	0.28561	0.537864	0.488434	0.31572	0.924542	0.37076	0.276838	0.175245	0.201584	0.390492
18	Shedder	Exposed	2	0.37131	0.398008	0.646227	4.03865	0.582411	0.724411	0.887037	2.4211	0.499143	0.327086	0.804779	0.561	0.510218	0.705125	0.900258	1.33904	0.325588	0.584901	0.601683	0.714002
18	Shedder	Exposed	4	1.32964	0.356909	0.158962	2.62119	1.10888	4.03489	2.10104	2.09912	0.325008	0.762527	1.12424	1.32204	0.2296	0.342355	0.771685	0.808744	0.201313	0.497511	0.278357	0.657842
18	Shedder	Exposed	6	0.639557	0.332448	0.656493	2.38475	0.439294	2.22289	0.80441	2.69742	0.421576	0.578338	1.07788	0.347431	0.51679	0.262574	0.358344	0.989225	0.656758	0.317698	0.432788	0.484799

## Sheet: 5°C pearson's corr cohab
Pearson's correlation analysis of 5°C PRV-3 exposed cohabitants (based on all time points).
*As dCt is calculated as Ct{[}PRV-3{]}-Ct{[}Reference gene{]}, the lowest dCt value corresponds to the highest virus load. Therefore, a negative value in the correlation analysis for PRV-3 dCt is a positive correlation.
	MX	CD4	CD8	IFNG	RSAD2	IFNc3	TNF	IL1B	IRF8	MHC class II	GZMA	RIGI	ISG15	TLR3	CXCL10	SAA	IFIT5	IFI44	IRF1	CSFR1	PRV-3 dCt
MX	1.00	0.72	-0.79	0.61	0.99	0.69	0.14	-0.33	0.76	0.62	0.74	0.98	0.98	0.90	0.88	0.72	0.96	0.95	0.91	0.67	-0.83
CD4	0.72	1.00	-0.63	0.63	0.72	0.53	0.01	-0.04	0.68	0.61	0.58	0.72	0.70	0.67	0.72	0.41	0.71	0.73	0.78	0.66	-0.56
CD8	-0.79	-0.63	1.00	-0.58	-0.81	-0.58	-0.10	0.22	-0.76	-0.68	-0.60	-0.83	-0.81	-0.80	-0.74	-0.55	-0.70	-0.78	-0.74	-0.76	0.65
IFNG	0.61	0.63	-0.58	1.00	0.64	0.32	0.44	-0.18	0.39	0.42	0.46	0.61	0.60	0.35	0.56	0.44	0.54	0.57	0.58	0.49	-0.47
RSAD2	0.99	0.72	-0.81	0.64	1.00	0.72	0.16	-0.37	0.77	0.61	0.77	0.98	0.99	0.89	0.88	0.75	0.95	0.96	0.91	0.70	-0.85
IFNc3	0.69	0.53	-0.58	0.32	0.72	1.00	-0.18	-0.17	0.68	0.55	0.76	0.69	0.71	0.76	0.65	0.61	0.72	0.74	0.75	0.46	-0.70
TNF	0.14	0.01	-0.10	0.44	0.16	-0.18	1.00	0.33	0.08	-0.07	-0.26	0.18	0.14	-0.04	0.27	0.05	0.05	0.12	0.15	0.14	0.07
IL1B	-0.33	-0.04	0.22	-0.18	-0.37	-0.17	0.33	1.00	-0.19	0.01	-0.44	-0.32	-0.33	-0.13	-0.09	-0.45	-0.30	-0.34	-0.13	-0.32	0.44
IRF8	0.76	0.68	-0.76	0.39	0.77	0.68	0.08	-0.19	1.00	0.68	0.45	0.83	0.75	0.82	0.84	0.38	0.71	0.86	0.76	0.81	-0.56
MHC class II	0.62	0.61	-0.68	0.42	0.61	0.55	-0.07	0.01	0.68	1.00	0.36	0.64	0.61	0.71	0.71	0.16	0.64	0.65	0.68	0.62	-0.39
GZMA	0.74	0.58	-0.60	0.46	0.77	0.76	-0.26	-0.44	0.45	0.36	1.00	0.69	0.79	0.69	0.49	0.85	0.75	0.68	0.65	0.40	-0.90
RIGI	0.98	0.72	-0.83	0.61	0.98	0.69	0.18	-0.32	0.83	0.64	0.69	1.00	0.98	0.90	0.92	0.68	0.94	0.98	0.92	0.74	-0.78
ISG15	0.98	0.70	-0.81	0.60	0.99	0.71	0.14	-0.33	0.75	0.61	0.79	0.98	1.00	0.92	0.87	0.73	0.96	0.95	0.93	0.63	-0.83
TLR3	0.90	0.67	-0.80	0.35	0.89	0.76	-0.04	-0.13	0.82	0.71	0.69	0.90	0.92	1.00	0.86	0.56	0.90	0.88	0.89	0.60	-0.73
CXCL10	0.88	0.72	-0.74	0.56	0.88	0.65	0.27	-0.09	0.84	0.71	0.49	0.92	0.87	0.86	1.00	0.45	0.86	0.93	0.93	0.70	-0.55
SAA	0.72	0.41	-0.55	0.44	0.75	0.61	0.05	-0.45	0.38	0.16	0.85	0.68	0.73	0.56	0.45	1.00	0.63	0.65	0.54	0.42	-0.87
IFIT5	0.96	0.71	-0.70	0.54	0.95	0.72	0.05	-0.30	0.71	0.64	0.75	0.94	0.96	0.90	0.86	0.63	1.00	0.93	0.94	0.57	-0.80
IFI44	0.95	0.73	-0.78	0.57	0.96	0.74	0.12	-0.34	0.86	0.65	0.68	0.98	0.95	0.88	0.93	0.65	0.93	1.00	0.92	0.74	-0.75
IRF1	0.91	0.78	-0.74	0.58	0.91	0.75	0.15	-0.13	0.76	0.68	0.65	0.92	0.93	0.89	0.93	0.54	0.94	0.92	1.00	0.58	-0.66
CSFR1	0.67	0.66	-0.76	0.49	0.70	0.46	0.14	-0.32	0.81	0.62	0.40	0.74	0.63	0.60	0.70	0.42	0.57	0.74	0.58	1.00	-0.57
PRV-3 dCt	-0.83	-0.56	0.65	-0.47	-0.85	-0.70	0.07	0.44	-0.56	-0.39	-0.90	-0.78	-0.83	-0.73	-0.55	-0.87	-0.80	-0.75	-0.66	-0.57	1.00

## Sheet: 5°C p-val pearson's corr cohab
P-value for Pearson's correlation analysis of 5°C PRV-3 exposed cohabitants (based on all time points)
	MX	CD4	CD8	IFNG	RSAD2	IFNc3	TNF	IL1B	IRF8	MHC class II	GZMA	RIGI	ISG15	TLR3	CXCL10	SAA	IFIT5	IFI44	IRF1	CSFR1	PRV-3 dCt
MX	0	0.000853	8.44E-05	0.007642	0	0.001397	0.585122	0.175232	0.000262	0.005572	0.000427	0	0	3E-07	1.12E-06	0.000799	0	0	1.1E-07	0.002492	1.84E-05
CD4	0.000853	0	0.00519	0.00517	0.000753	0.024223	0.956806	0.878964	0.002078	0.007262	0.012343	0.000726	0.001276	0.002583	0.000797	0.087946	0.000881	0.000545	0.000117	0.003035	0.014831
CD8	8.44E-05	0.00519	0	0.011409	5.41E-05	0.010929	0.687024	0.383859	0.00029	0.001872	0.00869	1.95E-05	4.65E-05	7.17E-05	0.000464	0.018416	0.001146	0.000127	0.0005	0.000261	0.003412
IFNG	0.007642	0.00517	0.011409	0	0.004452	0.200607	0.070658	0.466764	0.107359	0.084929	0.057197	0.007492	0.008754	0.159965	0.016493	0.071188	0.021553	0.014387	0.011228	0.039721	0.04902
RSAD2	0	0.000753	5.41E-05	0.004452	0	0.000724	0.534976	0.136382	0.000168	0.007696	0.000204	0	0	9.9E-07	1.34E-06	0.000302	0	0	1.1E-07	0.0012	9.15E-06
IFNc3	0.001397	0.024223	0.010929	0.200607	0.000724	0	0.462448	0.500831	0.002048	0.016842	0.000292	0.0016	0.000855	0.000255	0.00363	0.007643	0.000795	0.000471	0.000363	0.056301	0.001348
TNF	0.585122	0.956806	0.687024	0.070658	0.534976	0.462448	0	0.186562	0.750981	0.782932	0.306514	0.462801	0.587996	0.882262	0.278654	0.84755	0.836113	0.633536	0.556669	0.566851	0.783142
IL1B	0.175232	0.878964	0.383859	0.466764	0.136382	0.500831	0.186562	0	0.449057	0.968073	0.06453	0.188522	0.185764	0.602792	0.723526	0.059284	0.227033	0.173306	0.608651	0.202211	0.064673
IRF8	0.000262	0.002078	0.00029	0.107359	0.000168	0.002048	0.750981	0.449057	0	0.002083	0.064017	1.84E-05	0.000364	3.72E-05	1.49E-05	0.116892	0.00089	5.62E-06	0.000249	4.27E-05	0.016205
MHC class II	0.005572	0.007262	0.001872	0.084929	0.007696	0.016842	0.782932	0.968073	0.002083	0	0.141311	0.004023	0.006694	0.000871	0.000922	0.537285	0.003982	0.003419	0.001919	0.005946	0.106912
GZMA	0.000427	0.012343	0.00869	0.057197	0.000204	0.000292	0.306514	0.06453	0.064017	0.141311	0	0.001552	0.0001	0.001602	0.040712	7.25E-06	0.000385	0.001882	0.003203	0.104306	3.8E-07
RIGI	0	0.000726	1.95E-05	0.007492	0	0.0016	0.462801	0.188522	1.84E-05	0.004023	0.001552	0	0	3E-07	8E-08	0.002032	1E-08	0	7E-08	0.000459	0.000115
ISG15	0	0.001276	4.65E-05	0.008754	0	0.000855	0.587996	0.185764	0.000364	0.006694	0.0001	0	0	9E-08	2.14E-06	0.000526	0	0	3E-08	0.004696	1.68E-05
TLR3	3E-07	0.002583	7.17E-05	0.159965	9.9E-07	0.000255	0.882262	0.602792	3.72E-05	0.000871	0.001602	3E-07	9E-08	0	4.59E-06	0.015835	3E-07	1.43E-06	6.3E-07	0.00805	0.000557
CXCL10	1.12E-06	0.000797	0.000464	0.016493	1.34E-06	0.00363	0.278654	0.723526	1.49E-05	0.000922	0.040712	8E-08	2.14E-06	4.59E-06	0	0.060816	5.23E-06	2E-08	4E-08	0.001216	0.017827
SAA	0.000799	0.087946	0.018416	0.071188	0.000302	0.007643	0.84755	0.059284	0.116892	0.537285	7.25E-06	0.002032	0.000526	0.015835	0.060816	0	0.005457	0.003258	0.022074	0.078827	2.89E-06
IFIT5	0	0.000881	0.001146	0.021553	0	0.000795	0.836113	0.227033	0.00089	0.003982	0.000385	1E-08	0	3E-07	5.23E-06	0.005457	0	2E-08	0	0.014202	7.92E-05
IFI44	0	0.000545	0.000127	0.014387	0	0.000471	0.633536	0.173306	5.62E-06	0.003419	0.001882	0	0	1.43E-06	2E-08	0.003258	2E-08	0	8E-08	0.000448	0.000357
IRF1	1.1E-07	0.000117	0.0005	0.011228	1.1E-07	0.000363	0.556669	0.608651	0.000249	0.001919	0.003203	7E-08	3E-08	6.3E-07	4E-08	0.022074	0	8E-08	0	0.01111	0.002927
CSFR1	0.002492	0.003035	0.000261	0.039721	0.0012	0.056301	0.566851	0.202211	4.27E-05	0.005946	0.104306	0.000459	0.004696	0.00805	0.001216	0.078827	0.014202	0.000448	0.01111	0	0.013833
PRV-3 dCt	1.84E-05	0.014831	0.003412	0.04902	9.15E-06	0.001348	0.783142	0.064673	0.016205	0.106912	3.8E-07	0.000115	1.68E-05	0.000557	0.017827	2.89E-06	7.92E-05	0.000357	0.002927	0.013833	0

## Sheet: 5°C pearson's corr shed
Pearson's correlation analysis of 5°C PRV-3 exposed shedders (based on all time points).
*As dCt is calculated as Ct{[}PRV-3{]}-Ct{[}Reference gene{]}, the lowest dCt value corresponds to the highest virus load. Therefore, a negative value in the correlation analysis for PRV-3 dCt is a positive correlation.
	MX	CD4	CD8	IFNG	RSAD2	IFNc3	TNF	IL1B	IRF8	MHC class II	GZMA	RIGI	ISG15	TLR3	CXCL10	SAA	IFIT5	IFI44	IRF1	CSFR1	PRV-3 dCt
MX	1	0.559276	-0.19223	0.249919	0.96307	0.255269	-0.70112	-0.47598	0.068768	0.455564	0.843668	0.946853	0.947097	0.693558	0.636009	0.266564	0.934003	0.931619	0.676523	0.209491	-0.68181
CD4	0.559276	1	-0.35004	-0.06948	0.618414	0.025064	-0.50137	-0.21989	0.28344	0.510124	0.584331	0.678008	0.521577	0.481249	0.073356	0.253422	0.511824	0.62153	0.221622	0.529806	-0.24201
CD8	-0.19223	-0.35004	1	0.110959	-0.18158	-0.00284	0.253285	0.165172	-0.20286	-0.11641	-0.10303	-0.29327	-0.0824	-0.07423	0.226955	-0.24585	-0.07371	-0.2532	0.1386	-0.07668	0.044936
IFNG	0.249919	-0.06948	0.110959	1	0.255837	-0.10844	-0.20745	-0.08144	0.107563	0.097792	0.247151	0.274843	0.290788	0.267559	0.31897	-0.0108	0.300864	0.255961	0.292963	-0.14759	-0.16351
RSAD2	0.96307	0.618414	-0.18158	0.255837	1	0.284022	-0.6669	-0.38713	0.072798	0.473434	0.870755	0.956829	0.968011	0.723128	0.627112	0.330404	0.947046	0.949283	0.66062	0.208316	-0.67213
IFNc3	0.255269	0.025064	-0.00284	-0.10844	0.284022	1	0.048507	-0.17533	-0.36758	0.026042	0.197443	0.230965	0.266765	0.223745	0.337096	0.476863	0.272927	0.289725	0.373555	-0.15568	-0.36948
TNF	-0.70112	-0.50137	0.253285	-0.20745	-0.6669	0.048507	1	0.639789	-0.28141	-0.43649	-0.6797	-0.66268	-0.62109	-0.43265	-0.40072	0.092146	-0.55599	-0.65495	-0.38827	-0.34503	0.505921
IL1B	-0.47598	-0.21989	0.165172	-0.08144	-0.38713	-0.17533	0.639789	1	-0.14118	-0.45742	-0.46295	-0.42072	-0.35133	-0.3177	-0.2844	0.166865	-0.30553	-0.43914	-0.26376	-0.37896	0.374076
IRF8	0.068768	0.28344	-0.20286	0.107563	0.072798	-0.36758	-0.28141	-0.14118	1	0.544727	0.014048	0.191474	0.000961	0.351617	-0.00272	-0.42183	-0.00125	0.153777	0.078487	0.573014	0.210063
MHC class II	0.455564	0.510124	-0.11641	0.097792	0.473434	0.026042	-0.43649	-0.45742	0.544727	1	0.404001	0.522963	0.367245	0.621605	0.187168	-0.15384	0.356843	0.505354	0.327765	0.69706	-0.16137
GZMA	0.843668	0.584331	-0.10303	0.247151	0.870755	0.197443	-0.6797	-0.46295	0.014048	0.404001	1	0.859758	0.846178	0.464748	0.595851	0.253698	0.791931	0.8547	0.609447	0.180572	-0.74601
RIGI	0.946853	0.678008	-0.29327	0.274843	0.956829	0.230965	-0.66268	-0.42072	0.191474	0.522963	0.859758	1	0.927638	0.73627	0.577998	0.26597	0.914496	0.955192	0.635616	0.264974	-0.65702
ISG15	0.947097	0.521577	-0.0824	0.290788	0.968011	0.266765	-0.62109	-0.35133	0.000961	0.367245	0.846178	0.927638	1	0.674034	0.697489	0.290675	0.966517	0.893984	0.722135	0.093238	-0.70184
TLR3	0.693558	0.481249	-0.07423	0.267559	0.723128	0.223745	-0.43265	-0.3177	0.351617	0.621605	0.464748	0.73627	0.674034	1	0.483844	0.060427	0.733673	0.726825	0.521969	0.386795	-0.19756
CXCL10	0.636009	0.073356	0.226955	0.31897	0.627112	0.337096	-0.40072	-0.2844	-0.00272	0.187168	0.595851	0.577998	0.697489	0.483844	1	0.028135	0.647906	0.611233	0.866221	-0.06624	-0.64756
SAA	0.266564	0.253422	-0.24585	-0.0108	0.330404	0.476863	0.092146	0.166865	-0.42183	-0.15384	0.253698	0.26597	0.290675	0.060427	0.028135	1	0.263019	0.23062	0.066499	-0.39531	-0.18147
IFIT5	0.934003	0.511824	-0.07371	0.300864	0.947046	0.272927	-0.55599	-0.30553	-0.00125	0.356843	0.791931	0.914496	0.966517	0.733673	0.647906	0.263019	1	0.889295	0.688336	0.120025	-0.60804
IFI44	0.931619	0.62153	-0.2532	0.255961	0.949283	0.289725	-0.65495	-0.43914	0.153777	0.505354	0.8547	0.955192	0.893984	0.726825	0.611233	0.23062	0.889295	1	0.691769	0.301832	-0.66976
IRF1	0.676523	0.221622	0.1386	0.292963	0.66062	0.373555	-0.38827	-0.26376	0.078487	0.327765	0.609447	0.635616	0.722135	0.521969	0.866221	0.066499	0.688336	0.691769	1	0.138496	-0.65841
CSFR1	0.209491	0.529806	-0.07668	-0.14759	0.208316	-0.15568	-0.34503	-0.37896	0.573014	0.69706	0.180572	0.264974	0.093238	0.386795	-0.06624	-0.39531	0.120025	0.301832	0.138496	1	-0.0464
PRV-3 dCt	-0.68181	-0.24201	0.044936	-0.16351	-0.67213	-0.36948	0.505921	0.374076	0.210063	-0.16137	-0.74601	-0.65702	-0.70184	-0.19756	-0.64756	-0.18147	-0.60804	-0.66976	-0.65841	-0.0464	1

## Sheet: 5°C p-val pearson's corr shed
P-value of Pearson's correlation analysis of 5°C PRV-3 exposed shedders (based on all time points).
	MX	CD4	CD8	IFNG	RSAD2	IFNc3	TNF	IL1B	IRF8	MHC class II	GZMA	RIGI	ISG15	TLR3	CXCL10	SAA	IFIT5	IFI44	IRF1	CSFR1	PRV-3 dCt
MX	0	0.000478	0.268595	0.147635	0	0.138875	2.72E-06	0.00385	0.694668	0.005958	0	0	0	3.85E-06	4.02E-05	0.121646	0	0	8.14E-06	0.22712	6.49E-06
CD4	0.000478	0	0.039266	0.691652	7.52E-05	0.886356	0.002154	0.204361	0.098945	0.001744	0.000228	7.64E-06	0.001313	0.003425	0.675374	0.141856	0.001673	6.75E-05	0.200722	0.001064	0.161311
CD8	0.268595	0.039266	0	0.525712	0.296515	0.98706	0.142078	0.343018	0.242511	0.505455	0.555867	0.087304	0.637933	0.671732	0.189822	0.154556	0.673878	0.142219	0.427177	0.661531	0.797702
IFNG	0.147635	0.691652	0.525712	0	0.137969	0.535213	0.231775	0.641865	0.538534	0.576248	0.152321	0.110069	0.090134	0.120209	0.061812	0.950902	0.079047	0.137772	0.087646	0.397491	0.347974
RSAD2	0	7.52E-05	0.296515	0.137969	0	0.098224	1.22E-05	0.021588	0.677711	0.004072	0	0	0	9.3E-07	5.55E-05	0.052558	0	0	1.57E-05	0.229795	9.79E-06
IFNc3	0.138875	0.886356	0.98706	0.535213	0.098224	0	0.782001	0.313729	0.029828	0.88195	0.255579	0.181905	0.121355	0.196331	0.047676	0.003776	0.112672	0.09137	0.027075	0.371853	0.028928
TNF	2.72E-06	0.002154	0.142078	0.231775	1.22E-05	0.782001	0	0.000035	0.10149	0.008755	7.11E-06	1.44E-05	6.85E-05	0.009437	0.017055	0.598565	0.000525	1.96E-05	0.021174	0.042369	0.001931
IL1B	0.00385	0.204361	0.343018	0.641865	0.021588	0.313729	0.000035	0	0.418542	0.005732	0.005103	0.011847	0.038497	0.062918	0.097759	0.338026	0.074281	0.00831	0.12577	0.024769	0.026845
IRF8	0.694668	0.098945	0.242511	0.538534	0.677711	0.029828	0.10149	0.418542	0	0.000716	0.936161	0.270519	0.995628	0.03833	0.987627	0.011604	0.994334	0.377787	0.654035	0.000321	0.225824
MHC class II	0.005958	0.001744	0.505455	0.576248	0.004072	0.88195	0.008755	0.005732	0.000716	0	0.016088	0.001267	0.02999	6.73E-05	0.281643	0.377603	0.035354	0.001958	0.054589	3.28E-06	0.354409
GZMA	0	0.000228	0.555867	0.152321	0	0.255579	7.11E-06	0.005103	0.936161	0.016088	0	0	0	0.004911	0.000159	0.141407	1E-08	0	0.000102	0.299248	2.7E-07
RIGI	0	7.64E-06	0.087304	0.110069	0	0.181905	1.44E-05	0.011847	0.270519	0.001267	0	0	0	4.6E-07	0.000277	0.12251	0	0	4.08E-05	0.12397	1.81E-05
ISG15	0	0.001313	0.637933	0.090134	0	0.121355	6.85E-05	0.038497	0.995628	0.02999	0	0	0	9.04E-06	3.22E-06	0.090265	0	0	9.7E-07	0.594219	2.63E-06
TLR3	3.85E-06	0.003425	0.671732	0.120209	9.3E-07	0.196331	0.009437	0.062918	0.03833	6.73E-05	0.004911	4.6E-07	9.04E-06	0	0.003231	0.730228	5.3E-07	7.6E-07	0.0013	0.021712	0.255294
CXCL10	4.02E-05	0.675374	0.189822	0.061812	5.55E-05	0.047676	0.017055	0.097759	0.987627	0.281643	0.000159	0.000277	3.22E-06	0.003231	0	0.872539	2.58E-05	9.6E-05	0	0.705401	2.61E-05
SAA	0.121646	0.141856	0.154556	0.950902	0.052558	0.003776	0.598565	0.338026	0.011604	0.377603	0.141407	0.12251	0.090265	0.730228	0.872539	0	0.126872	0.182575	0.704283	0.018753	0.296819
IFIT5	0	0.001673	0.673878	0.079047	0	0.112672	0.000525	0.074281	0.994334	0.035354	1E-08	0	0	5.3E-07	2.58E-05	0.126872	0	0	4.87E-06	0.492223	0.000107
IFI44	0	6.75E-05	0.142219	0.137772	0	0.09137	1.96E-05	0.00831	0.377787	0.001958	0	0	0	7.6E-07	9.6E-05	0.182575	0	0	4.18E-06	0.078041	1.08E-05
IRF1	8.14E-06	0.200722	0.427177	0.087646	1.57E-05	0.027075	0.021174	0.12577	0.654035	0.054589	0.000102	4.08E-05	9.7E-07	0.0013	0	0.704283	4.87E-06	4.18E-06	0	0.427526	1.71E-05
CSFR1	0.22712	0.001064	0.661531	0.397491	0.229795	0.371853	0.042369	0.024769	0.000321	3.28E-06	0.299248	0.12397	0.594219	0.021712	0.705401	0.018753	0.492223	0.078041	0.427526	0	0.791259
PRV-3 dCt	6.49E-06	0.161311	0.797702	0.347974	9.79E-06	0.028928	0.001931	0.026845	0.225824	0.354409	2.7E-07	1.81E-05	2.63E-06	0.255294	2.61E-05	0.296819	0.000107	1.08E-05	1.71E-05	0.791259	0

## Sheet: 12°C pearson's corr cohab
Pearson's correlation analysis of 12°C PRV-3 exposed cohabitants (based on all time points).
*As dCt is calculated as Ct{[}PRV-3{]}-Ct{[}Reference gene{]}, the lowest dCt value corresponds to the highest virus load. Therefore, a negative value in the correlation analysis for PRV-3 dCt is a positive correlation.
	MX	CD4	CD8	IFNG	RSAD2	IFNc3	TNF	IL1B	IRF8	MHC class II	GZMA	RIGI	ISG15	TLR3	CXCL10	SAA	IFIT5	IFI44	IRF1	CSFR1	PRV-3 dCt
MX	1	0.722628	-0.03746	0.391922	0.97788	0.330512	-0.28575	-0.24092	-0.08131	0.541317	0.87766	0.957267	0.912202	0.700276	0.716373	0.263864	0.882426	0.89921	0.816377	0.000346	-0.85419
CD4	0.722628	1	0.072731	0.314971	0.741759	0.265424	-0.26661	-0.22485	-0.18885	0.397879	0.670831	0.678759	0.717135	0.567355	0.635775	0.263713	0.739166	0.600987	0.694619	0.038798	-0.6681
CD8	-0.03746	0.072731	1	0.164788	-0.02799	-0.16856	0.401694	0.587842	-0.76717	0.012919	-0.11944	-0.22711	0.255061	-0.09348	0.349789	-0.075	0.296583	-0.1679	0.353579	-0.52925	0.107923
IFNG	0.391922	0.314971	0.164788	1	0.480231	0.506175	-0.12487	-0.12143	-0.28615	-0.21265	0.377886	0.357928	0.564384	0.247246	0.506672	0.467512	0.558358	0.321991	0.561169	-0.4513	-0.48445
RSAD2	0.97788	0.741759	-0.02799	0.480231	1	0.438362	-0.32456	-0.27272	-0.13444	0.457558	0.879005	0.940692	0.938582	0.695541	0.761674	0.328881	0.922992	0.864596	0.829445	-0.1043	-0.87753
IFNc3	0.330512	0.265424	-0.16856	0.506175	0.438362	1	-0.17785	-0.23464	-0.11052	-0.19916	0.370666	0.34756	0.376784	0.200251	0.44365	0.38962	0.375541	0.206511	0.312753	-0.39516	-0.5075
TNF	-0.28575	-0.26661	0.401694	-0.12487	-0.32456	-0.17785	1	0.258104	-0.25448	-0.12941	-0.47626	-0.29284	-0.15153	-0.07189	0.054728	0.108262	-0.23679	-0.29199	-0.15843	-0.17087	0.339442
IL1B	-0.24092	-0.22485	0.587842	-0.12143	-0.27272	-0.23464	0.258104	1	-0.57166	0.003955	-0.19242	-0.37736	-0.07444	-0.28275	-0.095	0.1149	-0.04337	-0.11044	0.169334	-0.276	0.447177
IRF8	-0.08131	-0.18885	-0.76717	-0.28615	-0.13444	-0.11052	-0.25448	-0.57166	1	0.207109	-0.03981	0.127137	-0.40298	0.110762	-0.57613	-0.26146	-0.44026	0.085335	-0.49788	0.804457	-0.00539
MHC class II	0.541317	0.397879	0.012919	-0.21265	0.457558	-0.19916	-0.12941	0.003955	0.207109	1	0.510807	0.517175	0.362823	0.506271	0.139112	-0.2503	0.322448	0.567674	0.369892	0.531237	-0.39392
GZMA	0.87766	0.670831	-0.11944	0.377886	0.879005	0.370666	-0.47626	-0.19242	-0.03981	0.510807	1	0.860849	0.812583	0.542018	0.562156	0.284199	0.791449	0.845161	0.772302	-0.02203	-0.81268
RIGI	0.957267	0.678759	-0.22711	0.357928	0.940692	0.34756	-0.29284	-0.37736	0.127137	0.517175	0.860849	1	0.814214	0.754973	0.617667	0.303868	0.77658	0.911152	0.680181	0.149025	-0.80084
ISG15	0.912202	0.717135	0.255061	0.564384	0.938582	0.376784	-0.15153	-0.07444	-0.40298	0.362823	0.812583	0.814214	1	0.614491	0.833589	0.351769	0.984226	0.774999	0.940418	-0.34317	-0.81883
TLR3	0.700276	0.567355	-0.09348	0.247246	0.695541	0.200251	-0.07189	-0.28275	0.110762	0.506271	0.542018	0.754973	0.614491	1	0.491951	0.307868	0.601165	0.664078	0.505018	0.233194	-0.55312
CXCL10	0.716373	0.635775	0.349789	0.506672	0.761674	0.44365	0.054728	-0.095	-0.57613	0.139112	0.562156	0.617667	0.833589	0.491951	1	0.315261	0.832725	0.473699	0.738383	-0.47378	-0.5918
SAA	0.263864	0.263713	-0.075	0.467512	0.328881	0.38962	0.108262	0.1149	-0.26146	-0.2503	0.284199	0.303868	0.351769	0.307868	0.315261	1	0.327902	0.36093	0.365222	-0.28927	-0.22223
IFIT5	0.882426	0.739166	0.296583	0.558358	0.922992	0.375541	-0.23679	-0.04337	-0.44026	0.322448	0.791449	0.77658	0.984226	0.601165	0.832725	0.327902	1	0.733578	0.928888	-0.35945	-0.78457
IFI44	0.89921	0.600987	-0.1679	0.321991	0.864596	0.206511	-0.29199	-0.11044	0.085335	0.567674	0.845161	0.911152	0.774999	0.664078	0.473699	0.36093	0.733578	1	0.722144	0.182658	-0.71904
IRF1	0.816377	0.694619	0.353579	0.561169	0.829445	0.312753	-0.15843	0.169334	-0.49788	0.369892	0.772302	0.680181	0.940418	0.505018	0.738383	0.365222	0.928888	0.722144	1	-0.37307	-0.72605
CSFR1	0.000346	0.038798	-0.52925	-0.4513	-0.1043	-0.39516	-0.17087	-0.276	0.804457	0.531237	-0.02203	0.149025	-0.34317	0.233194	-0.47378	-0.28927	-0.35945	0.182658	-0.37307	1	0.103202
PRV-3 dCt	-0.85419	-0.6681	0.107923	-0.48445	-0.87753	-0.5075	0.339442	0.447177	-0.00539	-0.39392	-0.81268	-0.80084	-0.81883	-0.55312	-0.5918	-0.22223	-0.78457	-0.71904	-0.72605	0.103202	1

## Sheet: 12°C p-val pearson's corr cohab
P-value of Pearson's correlation analysis of 12°C PRV-3 exposed cohabitants (based on all time points).
	MX	CD4	CD8	IFNG	RSAD2	IFNc3	TNF	IL1B	IRF8	MHC class II	GZMA	RIGI	ISG15	TLR3	CXCL10	SAA	IFIT5	IFI44	IRF1	CSFR1	PRV-3 dCt
MX	0	0.000216	0.871931	0.078898	0	0.143372	0.209237	0.292785	0.726051	0.011269	1.7E-07	0	1E-08	0.000408	0.000259	0.247778	1.2E-07	3E-08	6.38E-06	0.998813	8.3E-07
CD4	0.000216	0	0.754051	0.164319	0.000119	0.244889	0.242717	0.327115	0.412306	0.074058	0.000873	0.000717	0.000254	0.00731	0.001951	0.248058	0.000129	0.00396	0.000476	0.867395	0.000933
CD8	0.871931	0.754051	0	0.475342	0.904155	0.465157	0.071078	0.005071	4.95E-05	0.955676	0.606074	0.322157	0.264488	0.686921	0.1201	0.746631	0.191723	0.466933	0.115864	0.01362	0.641468
IFNG	0.078898	0.164319	0.475342	0	0.027569	0.019217	0.589677	0.600049	0.208576	0.354715	0.09123	0.111138	0.007693	0.279906	0.01908	0.032598	0.008522	0.15461	0.008127	0.040021	0.026044
RSAD2	0	0.000119	0.904155	0.027569	0	0.046841	0.15116	0.231669	0.561225	0.037014	1.6E-07	0	0	0.000464	6.03E-05	0.145477	0	4.3E-07	3.34E-06	0.652754	1.7E-07
IFNc3	0.143372	0.244889	0.465157	0.019217	0.046841	0	0.440535	0.305926	0.633429	0.386769	0.098102	0.122642	0.092255	0.384116	0.043953	0.08083	0.093422	0.369112	0.167471	0.076241	0.018852
TNF	0.209237	0.242717	0.071078	0.589677	0.15116	0.440535	0	0.258633	0.26562	0.576104	0.02907	0.19766	0.512026	0.756811	0.813733	0.640417	0.301385	0.199018	0.492757	0.458977	0.132227
IL1B	0.292785	0.327115	0.005071	0.600049	0.231669	0.305926	0.258633	0	0.006782	0.986426	0.403365	0.091717	0.74846	0.214268	0.682094	0.619934	0.851938	0.633677	0.463074	0.225872	0.042105
IRF8	0.726051	0.412306	4.95E-05	0.208576	0.561225	0.633429	0.26562	0.006782	0	0.367696	0.863972	0.582885	0.070092	0.632673	0.006268	0.252264	0.04579	0.713036	0.021629	1.1E-05	0.981505
MHC class II	0.011269	0.074058	0.955676	0.354715	0.037014	0.386769	0.576104	0.986426	0.367696	0	0.017967	0.016355	0.105988	0.01919	0.54758	0.273814	0.153993	0.00727	0.09886	0.013208	0.077247
GZMA	1.7E-07	0.000873	0.606074	0.09123	1.6E-07	0.098102	0.02907	0.403365	0.863972	0.017967	0	5.5E-07	7.63E-06	0.011144	0.007992	0.211827	1.93E-05	1.42E-06	4.09E-05	0.924493	7.59E-06
RIGI	0	0.000717	0.322157	0.111138	0	0.122642	0.19766	0.091717	0.582885	0.016355	5.5E-07	0	7.07E-06	7.63E-05	0.002849	0.18052	3.48E-05	1E-08	0.000692	0.519111	1.29E-05
ISG15	1E-08	0.000254	0.264488	0.007693	0	0.092255	0.512026	0.74846	0.070092	0.105988	7.63E-06	7.07E-06	0	0.003038	2.69E-06	0.117873	0	3.7E-05	0	0.127765	5.67E-06
TLR3	0.000408	0.00731	0.686921	0.279906	0.000464	0.384116	0.756811	0.214268	0.632673	0.01919	0.011144	7.63E-05	0.003038	0	0.023498	0.174562	0.003947	0.001027	0.01954	0.309006	0.009301
CXCL10	0.000259	0.001951	0.1201	0.01908	6.03E-05	0.043953	0.813733	0.682094	0.006268	0.54758	0.007992	0.002849	2.69E-06	0.023498	0	0.163909	2.82E-06	0.030069	0.000132	0.030038	0.004712
SAA	0.247778	0.248058	0.746631	0.032598	0.145477	0.08083	0.640417	0.619934	0.252264	0.273814	0.211827	0.18052	0.117873	0.174562	0.163909	0	0.146752	0.107958	0.103529	0.203437	0.332942
IFIT5	1.2E-07	0.000129	0.191723	0.008522	0	0.093422	0.301385	0.851938	0.04579	0.153993	1.93E-05	3.48E-05	0	0.003947	2.82E-06	0.146752	0	0.000154	0	0.109513	2.55E-05
IFI44	3E-08	0.00396	0.466933	0.15461	4.3E-07	0.369112	0.199018	0.633677	0.713036	0.00727	1.42E-06	1E-08	3.7E-05	0.001027	0.030069	0.107958	0.000154	0	0.000219	0.428074	0.00024
IRF1	6.38E-06	0.000476	0.115864	0.008127	3.34E-06	0.167471	0.492757	0.463074	0.021629	0.09886	4.09E-05	0.000692	0	0.01954	0.000132	0.103529	0	0.000219	0	0.095775	0.000194
CSFR1	0.998813	0.867395	0.01362	0.040021	0.652754	0.076241	0.458977	0.225872	1.1E-05	0.013208	0.924493	0.519111	0.127765	0.309006	0.030038	0.203437	0.109513	0.428074	0.095775	0	0.656203
PRV-3 dCt	8.3E-07	0.000933	0.641468	0.026044	1.7E-07	0.018852	0.132227	0.042105	0.981505	0.077247	7.59E-06	1.29E-05	5.67E-06	0.009301	0.004712	0.332942	2.55E-05	0.00024	0.000194	0.656203	0

## Sheet: 12°C pearson's corr shed
Pearson's correlation analysis of 12°C PRV-3 exposed shedders (based on all time points).
*As dCt is calculated as Ct{[}PRV-3{]}-Ct{[}Reference gene{]}, the lowest dCt value corresponds to the highest virus load. Therefore, a negative value in the correlation analysis for PRV-3 dCt is a positive correlation.
	MX	CD4	CD8	IFNG	RSAD2	IFNc3	TNF	IL1B	IRF8	MHC class II	GZMA	RIGI	ISG15	TLR3	CXCL10	SAA	IFIT5	IFI44	IRF1	CSFR1	PRV-3 dCt
MX	1	-0.10583	-0.37156	0.275527	0.875626	0.440674	-0.10631	-0.13631	0.23417	-0.149	-0.17301	0.909506	0.772776	0.671051	0.718273	0.346054	0.748587	0.888428	0.541349	-0.10579	-0.51135
CD4	-0.10583	1	0.298985	-0.17946	-0.29979	0.205619	0.361091	0.0044	0.631095	0.373581	0.157772	-0.03819	-0.34266	-0.16347	-0.25851	-0.23256	-0.37246	-0.1885	0.045348	0.490275	0.102352
CD8	-0.37156	0.298985	1	-0.31842	-0.54093	-0.2067	0.258226	-0.14385	0.455892	0.578957	-0.16921	-0.27355	-0.67192	-0.11841	-0.35187	-0.5406	-0.39609	-0.50494	-0.52023	0.616784	0.595373
IFNG	0.275527	-0.17946	-0.31842	1	0.253806	0.231683	-0.22318	0.174734	-0.05868	-0.50617	0.367855	0.104415	0.39481	-0.13245	0.25508	-0.07988	0.300595	0.175549	0.449568	-0.39566	-0.42468
RSAD2	0.875626	-0.29979	-0.54093	0.253806	1	0.507873	-0.07603	-0.05536	-0.0106	-0.12875	-0.29551	0.84603	0.929875	0.740638	0.813944	0.539469	0.890068	0.834731	0.725736	-0.44157	-0.57978
IFNc3	0.440674	0.205619	-0.2067	0.231683	0.507873	1	0.488899	0.294213	0.052175	-0.06368	-0.08962	0.350517	0.457183	0.32061	0.440654	0.552275	0.445479	0.28676	0.584292	-0.43653	-0.46644
TNF	-0.10631	0.361091	0.258226	-0.22318	-0.07603	0.488899	1	0.373791	0.259409	0.294193	-0.39045	-0.07785	-0.20143	0.22013	0.052793	0.029283	-0.0133	-0.12837	0.254692	0.066577	0.254933
IL1B	-0.13631	0.0044	-0.14385	0.174734	-0.05536	0.294213	0.373791	1	0.060118	-0.36421	-0.28813	-0.14337	-0.00427	0.035647	0.324774	0.231394	0.048509	-0.02768	0.181999	-0.38476	-0.00701
IRF8	0.23417	0.631095	0.455892	-0.05868	-0.0106	0.052175	0.259409	0.060118	1	0.488081	-0.25115	0.307452	-0.12511	0.226996	0.175673	-0.38492	0.042065	0.02877	0.119543	0.573202	0.255949
MHC class II	-0.149	0.373581	0.578957	-0.50617	-0.12875	-0.06368	0.294193	-0.36421	0.488081	1	-0.31234	0.06834	-0.36558	0.172953	-0.20826	-0.29853	-0.18944	-0.24777	-0.09628	0.49558	0.493636
GZMA	-0.17301	0.157772	-0.16921	0.367855	-0.29551	-0.08962	-0.39045	-0.28813	-0.25115	-0.31234	1	-0.44843	-0.14669	-0.7822	-0.57299	0.086467	-0.45815	-0.28134	-0.25052	-0.09882	-0.42178
RIGI	0.909506	-0.03819	-0.27355	0.104415	0.84603	0.350517	-0.07785	-0.14337	0.307452	0.06834	-0.44843	1	0.690755	0.844533	0.790746	0.188385	0.736717	0.86342	0.543574	0.039545	-0.28409
ISG15	0.772776	-0.34266	-0.67192	0.39481	0.929875	0.457183	-0.20143	-0.00427	-0.12511	-0.36558	-0.14669	0.690755	1	0.557027	0.748241	0.524652	0.899329	0.751721	0.753482	-0.59743	-0.69126
TLR3	0.671051	-0.16347	-0.11841	-0.13245	0.740638	0.32061	0.22013	0.035647	0.226996	0.172953	-0.7822	0.844533	0.557027	1	0.825506	0.198427	0.751105	0.685681	0.512623	-0.00039	0.011367
CXCL10	0.718273	-0.25851	-0.35187	0.25508	0.813944	0.440654	0.052793	0.324774	0.175673	-0.20826	-0.57299	0.790746	0.748241	0.825506	1	0.355409	0.830935	0.673802	0.608412	-0.30972	-0.31383
SAA	0.346054	-0.23256	-0.5406	-0.07988	0.539469	0.552275	0.029283	0.231394	-0.38492	-0.29853	0.086467	0.188385	0.524652	0.198427	0.355409	1	0.331839	0.328458	0.26418	-0.65613	-0.66672
IFIT5	0.748587	-0.37246	-0.39609	0.300595	0.890068	0.445479	-0.0133	0.048509	0.042065	-0.18944	-0.45815	0.736717	0.899329	0.751105	0.830935	0.331839	1	0.722336	0.724337	-0.47098	-0.36228
IFI44	0.888428	-0.1885	-0.50494	0.175549	0.834731	0.28676	-0.12837	-0.02768	0.02877	-0.24777	-0.28134	0.86342	0.751721	0.685681	0.673802	0.328458	0.722336	1	0.541537	-0.19992	-0.43172
IRF1	0.541349	0.045348	-0.52023	0.449568	0.725736	0.584292	0.254692	0.181999	0.119543	-0.09628	-0.25052	0.543574	0.753482	0.512623	0.608412	0.26418	0.724337	0.541537	1	-0.45213	-0.44852
CSFR1	-0.10579	0.490275	0.616784	-0.39566	-0.44157	-0.43653	0.066577	-0.38476	0.573202	0.49558	-0.09882	0.039545	-0.59743	-0.00039	-0.30972	-0.65613	-0.47098	-0.19992	-0.45213	1	0.555591

## Sheet: 12°C p-val pearson's corr shed
P-value of Pearson's correlation analysis of 12°C PRV-3 exposed shedders (based on all time points).
PRV-3 dCt	-0.51135	0.102352	0.595373	-0.42468	-0.57978	-0.46644	0.254933	-0.00701	0.255949	0.493636	-0.42178	-0.28409	-0.69126	0.011367	-0.31383	-0.66672	-0.36228	-0.43172	-0.44852	0.555591	1
	MX	CD4	CD8	IFNG	RSAD2	IFNc3	TNF	IL1B	IRF8	MHC class II	GZMA	RIGI	ISG15	TLR3	CXCL10	SAA	IFIT5	IFI44	IRF1	CSFR1	PRV-3 dCt
MX	0	0.69647	0.156478	0.301663	8.83E-06	0.087556	0.69517	0.614709	0.382703	0.581797	0.521667	1.05E-06	0.000449	0.00443	0.001724	0.189202	0.000849	4.28E-06	0.030337	0.696586	0.042921
CD4	0.69647	0	0.260631	0.506012	0.259283	0.444881	0.169411	0.987098	0.008751	0.154061	0.559509	0.888339	0.193866	0.545228	0.333674	0.386066	0.1554	0.484471	0.867557	0.053857	0.706033
CD8	0.156478	0.260631	0	0.229383	0.030492	0.442449	0.33423	0.595065	0.075938	0.018777	0.531001	0.305288	0.004359	0.662279	0.18137	0.030612	0.128825	0.046053	0.038847	0.01093	0.014964
IFNG	0.301663	0.506012	0.229383	0	0.342859	0.38792	0.406056	0.517472	0.829082	0.045437	0.160978	0.70036	0.130177	0.624859	0.340358	0.768716	0.257948	0.515487	0.080622	0.129281	0.10108
RSAD2	8.83E-06	0.259283	0.030492	0.342859	0	0.044599	0.779591	0.838627	0.968912	0.634631	0.266483	3.62E-05	1.9E-07	0.001032	0.000125	0.031031	3.87E-06	5.76E-05	0.00146	0.086841	0.01857
IFNc3	0.087556	0.444881	0.442449	0.38792	0.044599	0	0.054636	0.268684	0.847822	0.81476	0.741345	0.183178	0.075007	0.226012	0.087573	0.026534	0.083759	0.281562	0.017464	0.090933	0.068567
TNF	0.69517	0.169411	0.33423	0.406056	0.779591	0.054636	0	0.153811	0.331941	0.268718	0.134856	0.774426	0.454414	0.412664	0.846037	0.914273	0.961008	0.635635	0.341119	0.806474	0.340648
IL1B	0.614709	0.987098	0.595065	0.517472	0.838627	0.268684	0.153811	0	0.824964	0.165481	0.279161	0.596307	0.987469	0.895726	0.219699	0.38853	0.858409	0.918944	0.499924	0.141145	0.979436
IRF8	0.382703	0.008751	0.075938	0.829082	0.968912	0.847822	0.331941	0.824964	0	0.055103	0.348105	0.246709	0.644329	0.39786	0.515187	0.140962	0.877074	0.915769	0.659233	0.020279	0.33866
MHC class II	0.581797	0.154061	0.018777	0.045437	0.634631	0.81476	0.268718	0.165481	0.055103	0	0.238888	0.801444	0.163778	0.521814	0.438927	0.261389	0.48225	0.354851	0.722797	0.050928	0.051987
GZMA	0.521667	0.559509	0.531001	0.160978	0.266483	0.741345	0.134856	0.279161	0.348105	0.238888	0	0.081483	0.587738	0.000343	0.020335	0.750174	0.074316	0.291159	0.349365	0.715778	0.103688
RIGI	1.05E-06	0.888339	0.305288	0.70036	3.62E-05	0.183178	0.774426	0.596307	0.246709	0.801444	0.081483	0	0.00305	3.86E-05	0.000265	0.484734	0.001133	1.64E-05	0.029531	0.884391	0.28626
ISG15	0.000449	0.193866	0.004359	0.130177	1.9E-07	0.075007	0.454414	0.987469	0.644329	0.163778	0.587738	0.00305	0	0.024999	0.000857	0.036933	2.15E-06	0.000785	0.000751	0.014532	0.00302
TLR3	0.00443	0.545228	0.662279	0.624859	0.001032	0.226012	0.412664	0.895726	0.39786	0.521814	0.000343	3.86E-05	0.024999	0	8.22E-05	0.461306	0.000797	0.003366	0.042318	0.998866	0.966672
CXCL10	0.001724	0.333674	0.18137	0.340358	0.000125	0.087573	0.846037	0.219699	0.515187	0.438927	0.020335	0.000265	0.000857	8.22E-05	0	0.17672	6.69E-05	0.004211	0.01239	0.243056	0.236533
SAA	0.189202	0.386066	0.030612	0.768716	0.031031	0.026534	0.914273	0.38853	0.140962	0.261389	0.750174	0.484734	0.036933	0.461306	0.17672	0	0.209248	0.214208	0.322803	0.005776	0.004791
IFIT5	0.000849	0.1554	0.128825	0.257948	3.87E-06	0.083759	0.961008	0.858409	0.877074	0.48225	0.074316	0.001133	2.15E-06	0.000797	6.69E-05	0.209248	0	0.001576	0.001507	0.065564	0.167913
IFI44	4.28E-06	0.484471	0.046053	0.515487	5.76E-05	0.281562	0.635635	0.918944	0.915769	0.354851	0.291159	1.64E-05	0.000785	0.003366	0.004211	0.214208	0.001576	0	0.030268	0.457864	0.094956
IRF1	0.030337	0.867557	0.038847	0.080622	0.00146	0.017464	0.341119	0.499924	0.659233	0.722797	0.349365	0.029531	0.000751	0.042318	0.01239	0.322803	0.001507	0.030268	0	0.078698	0.081416
CSFR1	0.696586	0.053857	0.01093	0.129281	0.086841	0.090933	0.806474	0.141145	0.020279	0.050928	0.715778	0.884391	0.014532	0.998866	0.243056	0.005776	0.065564	0.457864	0.078698	0	0.025455
PRV-3 dCt	0.042921	0.706033	0.014964	0.10108	0.01857	0.068567	0.340648	0.979436	0.33866	0.051987	0.103688	0.28626	0.00302	0.966672	0.236533	0.004791	0.167913	0.094956	0.081416	0.025455	0

[truncated: 4 more sheets: 18°C pearson's corr cohab, 18°C p-val pearson's corr cohab, 18°C pearson's corr shed, 18°C p-val pearson's corr shed]
